# Supplementary material
Source: publisher figshare collection journal article supplement (https://acs.figshare.com/ndownloader/files/5701302)
Supplement: Supplementary file 1 [file 5701302]

Supporting Information for:

**Short Metal–Metal Separations in a Highly Luminescent Trimetallic Ag(I)  
Complex Stabilized by Bridging NHC Ligands.**

Vincent J. Catalano\* and Mark A. Malwitz

[vjc@unr.edu](mailto:vjc@unr.edu)

**Preparation of  $[(\text{pyCH}_2)_2\text{im}]_2\text{AgCl}$ ,  $1\bullet\text{Cl}$ .** Method A: A 100 mL round bottom flask was charged with 2.51 g (8.75 mmol) of  $[\text{H}(\text{pyCH}_2)_2\text{im}]\text{Cl}$ , 1.01 g (4.38 mmol) of  $\text{Ag}_2\text{O}$  and 50 mL of  $\text{CH}_2\text{Cl}_2$ . The flask was removed from light and stirred at room temperature for 4 hours. The mixture was then filtered through Celite, reduced in volume and precipitated with  $\text{Et}_2\text{O}$  leaving 0.66 g (1.02 mmol) of  $1\bullet\text{Cl}$  as a beige powder (23%).

Method B: A 50 mL round bottom flask was charged with 1.00 g (3.49 mmol) of  $[\text{H}(\text{pyCH}_2)_2\text{im}]\text{Cl}$ , a catalytic amount of  $[\text{Bu}_4\text{N}]\text{Cl}$ , and 15 mL of  $\text{CH}_2\text{Cl}_2$ . The flask was then charged with a mixture of 15 mL of 1 M NaOH and 0.202 g (0.872 mmol) of  $\text{Ag}_2\text{O}$ . The flask was removed from light and stirred at room temperature for 4 hours. The organic layer was separated and the aqueous layer extracted with  $\text{CH}_2\text{Cl}_2$  (3 x 20 mL). The organic layers were combined, filtered through Celite, reduced in volume and precipitated with  $\text{Et}_2\text{O}$  leaving 0.47 g of  $1\bullet\text{Cl}$  as a beige powder (38%).

**Preparation of  $1\bullet\text{BF}_4$ .** Method A: A 50 mL round bottom flask was charged with 0.50 (0.78 mmol) of  $1\bullet\text{Cl}$  and excess  $\text{NaBF}_4$ . To this was added 20 mL of  $\text{CH}_2\text{Cl}_2$  and 5 mL of MeOH. This mixture was placed in an ultrasonic cleaner for 5 minutes. The volatiles were then removed with a rotary evaporator. To the remaining brown residue was added 15 mL  $\text{CH}_2\text{Cl}_2$  of and this mixture was then filtered through Celite. The remaining light brown solution was reduced in volume and precipitated with  $\text{Et}_2\text{O}$  affording 0.48 g (0.69 mmol) of  $1\bullet\text{BF}_4$  as a beige powder (89%). Method B: A 100 mL round bottom flask was charged with 1.66 g (4.85 mmol) of  $[\text{H}(\text{pyCH}_2)_2\text{im}](\text{BF}_4)$ , a catalytic amount of  $[\text{Bu}_4\text{N}](\text{BF}_4)$ , and 30 mL  $\text{CH}_2\text{Cl}_2$ . To this was added a mixture of 20 mL of 1 M NaOH and 0.282 g (1.22 mmol) of  $\text{Ag}_2\text{O}$ . The flask was removed from light and the mixture stirred at room temperature for 4 hours. The organic layer was separated and the

aqueous layer extracted with CH<sub>2</sub>Cl<sub>2</sub> (3 x 20 mL). The organic layers were combined, filtered through Celite, reduced in volume and precipitated with Et<sub>2</sub>O affording 1.34 g (1.93 mmol) of **1**•BF<sub>4</sub> as a beige solid (79%). Anal. Calcd (C<sub>30</sub>H<sub>28</sub>N<sub>8</sub>AgBF<sub>4</sub>): C, 51.83; H, 4.06; N, 16.12. Found: C, 51.60; H, 3.97; N, 15.86. <sup>1</sup>H NMR (300 MHz, CDCl<sub>3</sub>, 25°C): δ = 8.46 (m), 7.65 (m), 7.30 (m), 7.21 (s), 7.19 (m), 5.41 (s). <sup>13</sup>C{<sup>1</sup>H} NMR (75 MHz, CDCl<sub>3</sub>, 25°C): δ = ??? (m), 155.5, 149.8, 137.7, 123.6, 122.8, 122.6, 57.1. UV (CH<sub>3</sub>CN) λ<sub>max</sub>, nm (ε): 243 (14123), 249 (14868), 254 (15463), 260 (13774), 266 (sh, 9614), 360 (905).

**Preparation of [((pyCH<sub>2</sub>)<sub>2</sub>im)<sub>3</sub>Ag<sub>3</sub>](BF<sub>4</sub>)<sub>3</sub>, **2**.** Method A: A 50 mL round bottom flask was charged with 1.00 g (2.92 mmol) of [H(pyCH<sub>2</sub>)<sub>2</sub>im](BF<sub>4</sub>) and 3.38 g (14.6 mmol) of Ag<sub>2</sub>O in 30 mL of CH<sub>3</sub>CN. The mixture was removed from light and brought to reflux overnight. The mixture was cooled, filtered through Celite, reduced in volume and precipitated with Et<sub>2</sub>O affording 1.04 g (0.779 mmol) of **2** as an off-white powder (79%). Method B: A 100 mL round bottom flask was charged with 2.66 g (3.83 mmol) of **1**•BF<sub>4</sub>, 1.49 g (7.65 mmol) of AgBF<sub>4</sub> and 50 mL of CH<sub>3</sub>CN. This mixture was removed from light and brought to reflux for 6 hours. The mixture was cooled, filtered through Celite, reduced in volume and precipitated with Et<sub>2</sub>O affording 0.981 g (0.735 mmol) of **2** as an off-white powder (51%). Anal. Calcd (C<sub>45</sub>H<sub>42</sub>N<sub>12</sub>Ag<sub>3</sub>B<sub>3</sub>F<sub>12</sub>): C, 40.49; H, 3.17; N, 12.59. Found: C, 40.69; H, 3.09; N, 12.55. <sup>1</sup>H NMR (300 MHz, CD<sub>3</sub>CN, 25°C): δ = 7.95 (m), 7.66 (m), 7.63 (s), 7.32-7.26 (m), 5.20 (s). <sup>13</sup>C{<sup>1</sup>H} NMR (126 MHz, CD<sub>3</sub>CN, 25°C): δ = 175.4 (m), 154.0, 151.2, 140.8, 126.5, 126.2, 125.8, 56.5. UV (CH<sub>3</sub>CN) λ<sub>max</sub>, nm (ε): 254 (28353), 260 (27282), 266 (21436), 296 (sh, 4422).

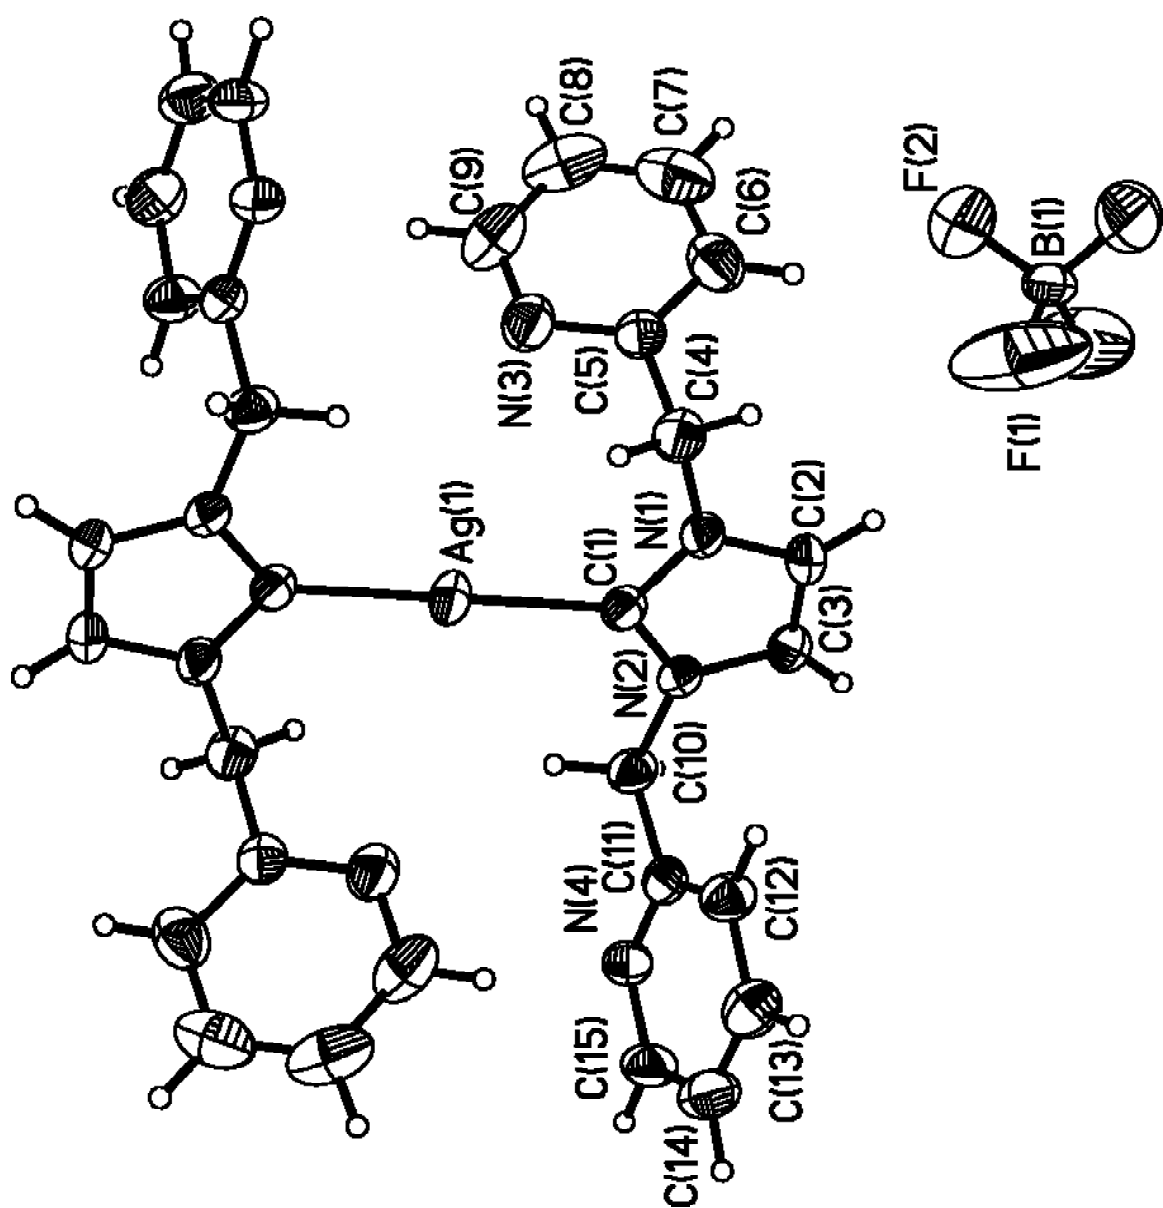

Figure S1. Thermal ellipsoid plot of  $[(\text{pyCH}_2)_2\text{im}]_2\text{Ag}^+\text{BF}_4^-$  drawn at 40%. The nearest  $\text{Ag}\cdots\text{Ag}$  interaction is over 8.45 Å.

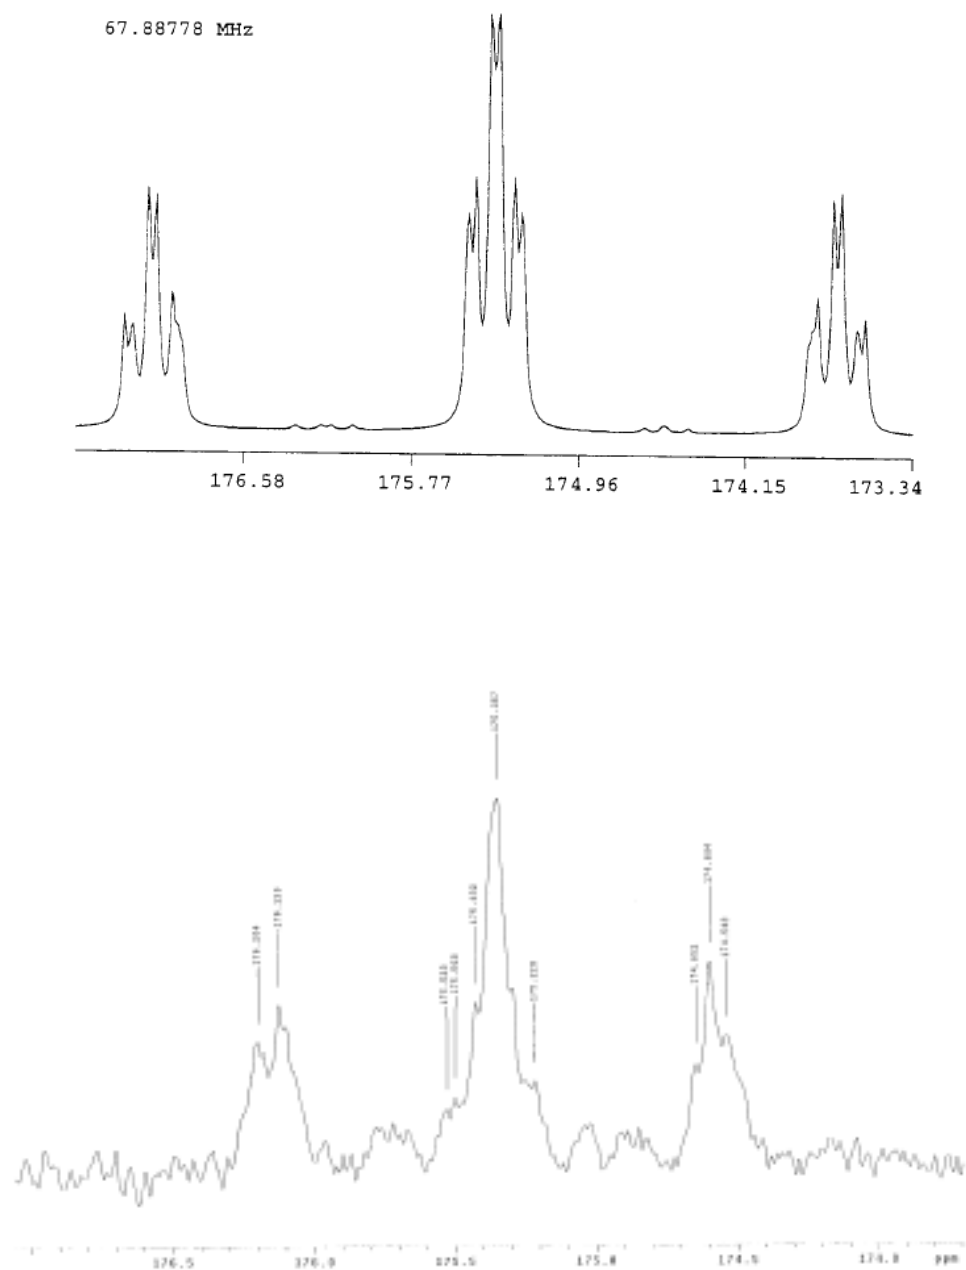

Figure S2.  $^{13}\text{C}\{^1\text{H}\}$  NMR spectrum of carbene region for **2** (bottom) and simulated spectrum (top) using  $^1J_{\text{Ag-C}} = 104.5$  Hz,  $^2J_{\text{Ag-C}} = 8.0$  Hz and  $^3J_{\text{Ag-C}} = 3.0$  Hz.
